# Supplementary material
Source: PubMed Central journal article supplement (PMC2940480)
Supplement: me.2010-0071_1.pdf [file me.2010-0071_1.pdf]

## **Supplemental figure legends.**

**Supplemental Figure. 1. Mutated HA-MC4R I-316S is retained in the ER.** A large fraction of HA-MC4R-I316S co-localizes with calnexin in the ER. N2A cells were transiently transfected with wt-HA-MC4R and mutant HA-MC4R-I316S. Cells were stained with primary rabbit polyclonal antibodies against calnexin and rat monoclonal antibodies against the HA tag. Secondary staining was carried out by using Cy3-conjugated anti-rat and FITC-conjugated anti-rabbit antibodies.

**Supplemental Figure. 2. Mutated HA-MC4R-I316S is more ubiquitinated than wt-HA-MC4R.** N2A cells were transiently transfected with Flag-ubiquitin or co-transfected with Flag-ubiquitin and wt HA-MC4R or mutated HA-MC4R I316S. Immunoprecipitations from cell lysates were carried out with anti-HA-antibodies. Immunoprecipitated samples and cell lysates were analyzed by Western blot by using mouse monoclonal anti-Flag antibodies.

HA-MC4R

Cy3

calnexin

merge

wt

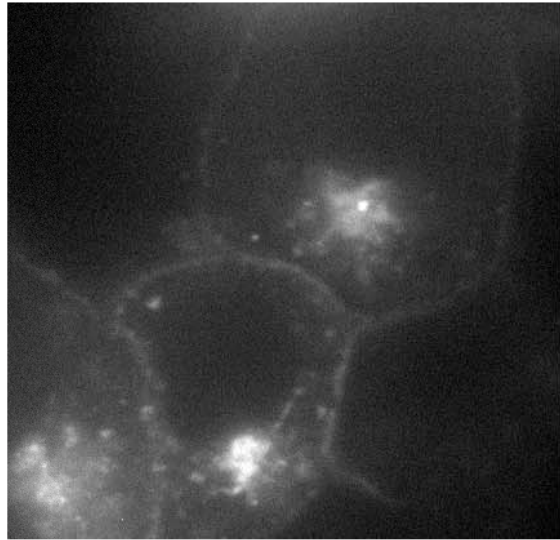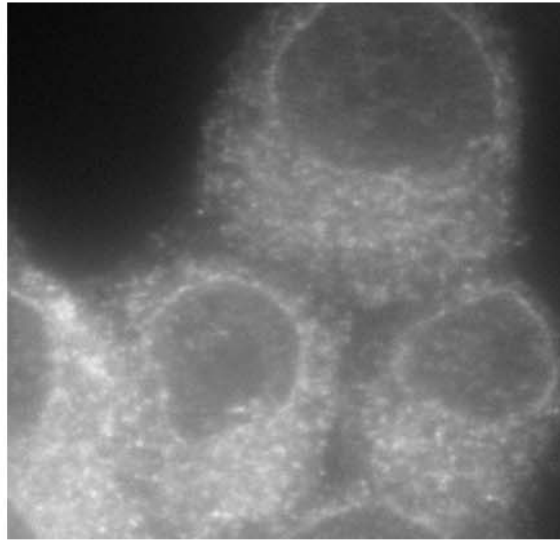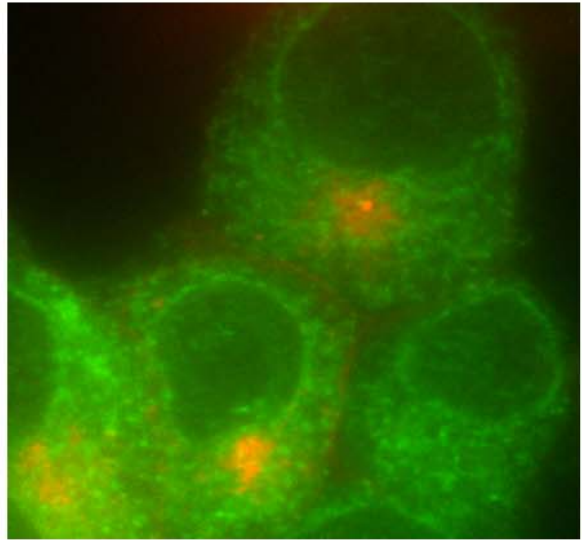

I316S

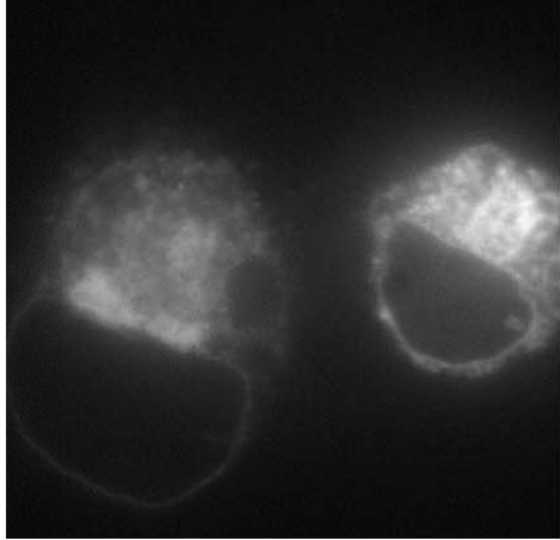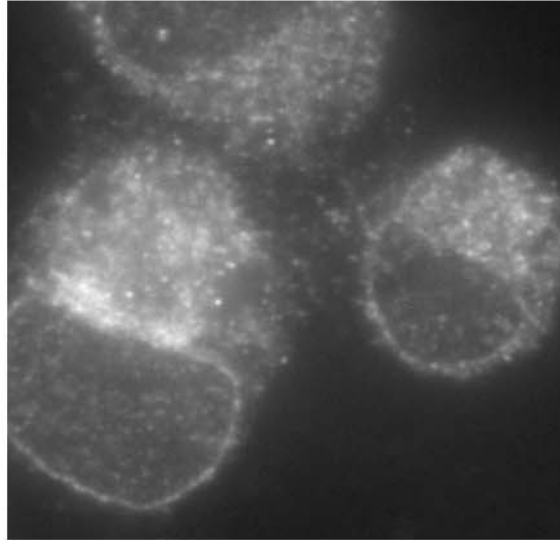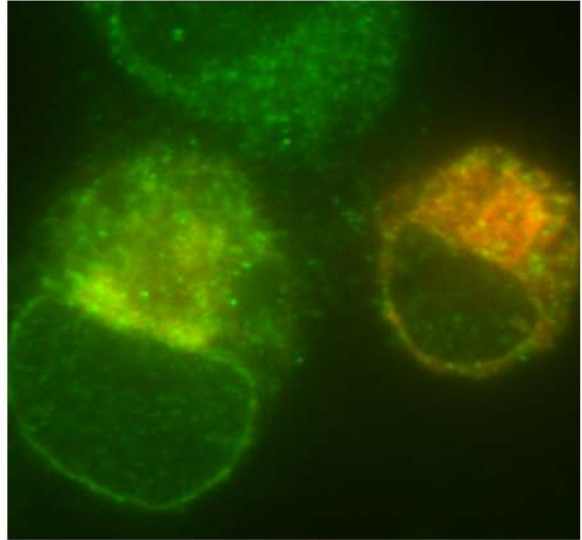

cell lysates

WB= anti-HA-POD

9% gel

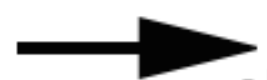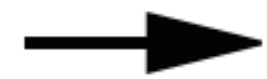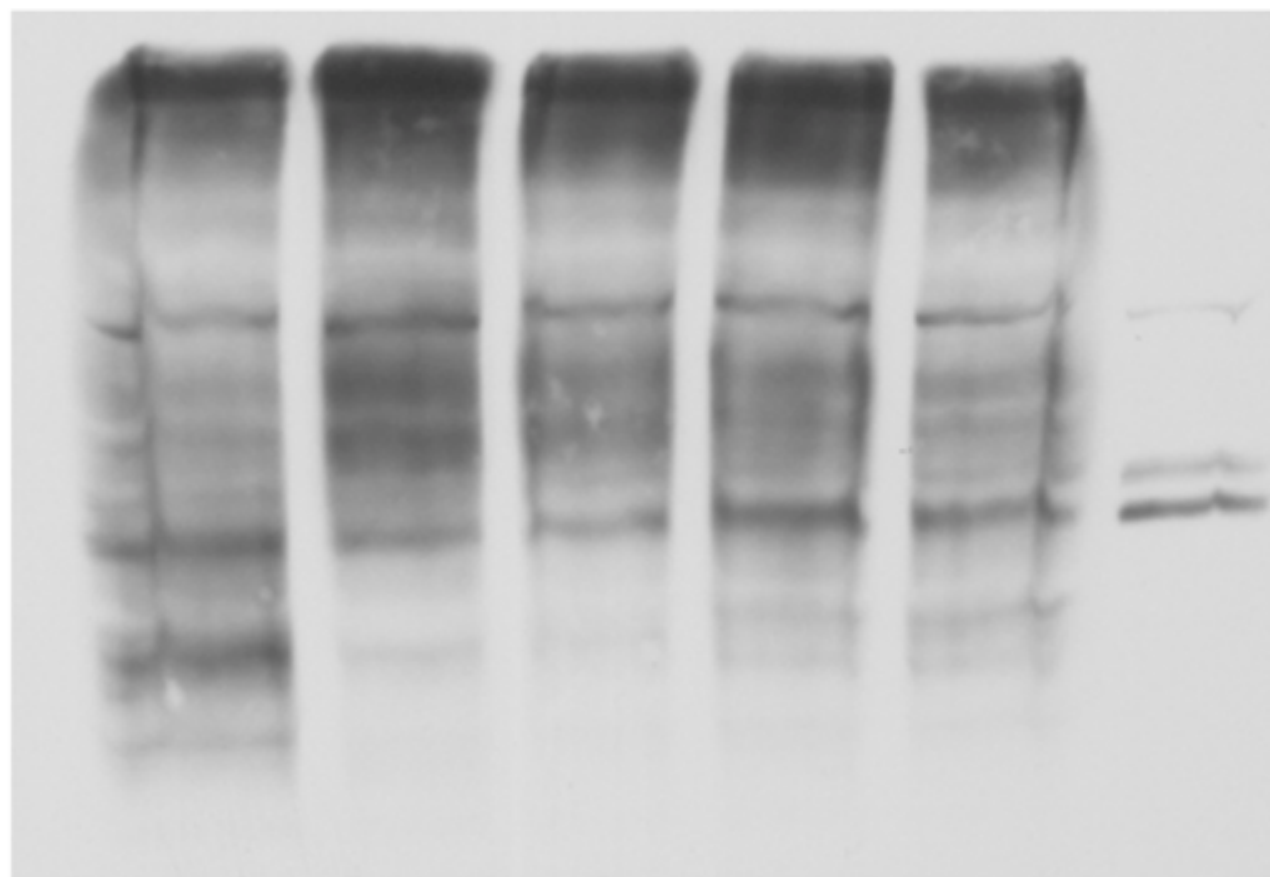

-250kD

\*

\*

\*-98kD

-64kD

wt

P78L

R165W

I316S

I317T

control
